# Supplementary material for: Mitochondrial quality control in amyotrophic lateral sclerosis: towards a common pathway?
Source: PubMed Central journal article supplement — Neural Regen Res. 2017 Jul;12(7):1052–61. doi: 10.4103/1673-5374.211179 (PMC5558479; doi:10.4103/1673-5374.211179), 2017-07
Supplement: NRR-12-1052_Suppl1.pdf [file NRR-12-1052_Suppl1.pdf]

**Additional Table 1 Mitochondrial quality control processes that are altered by ALS causing genes**

| ALS-related gene | Gene function          | Studied gene form                                                         | Study model                                         | Mitochondrial quality control defects                                                                                                                 | Reference                |
|------------------|------------------------|---------------------------------------------------------------------------|-----------------------------------------------------|-------------------------------------------------------------------------------------------------------------------------------------------------------|--------------------------|
| SOD1             | Anti-oxidative defense | G93A                                                                      | Mice motor neurons                                  | Activated mitophagy: degenerating mitochondria                                                                                                        | Kong and Xu, 1998        |
|                  |                        | G93A                                                                      | NSC-34 cells                                        | Impaired MPQC: decreased Lon and Hsp70 expression                                                                                                     | Fukada et al., 2004      |
|                  |                        | G93A                                                                      | NSC-34 cells                                        | Mitochondrial fragmentation                                                                                                                           | Raimondi et al., 2006    |
|                  |                        | G93A                                                                      | Mice motor neurons                                  | Impaired anterograde mitochondrial transport                                                                                                          | De Vos et al., 2007      |
|                  |                        | G93A                                                                      | Mice spinal cord, neuroblastoma cells               | Increased Hsp70 expression                                                                                                                            | Yamashita et al., 2007   |
|                  |                        | G93A                                                                      | NSC-34 cells                                        | Mitochondrial fragmentation                                                                                                                           | Magrané et al., 2009     |
|                  |                        | G37R, G85R                                                                | Mice motor neurons                                  | Mitochondrial fragmentation                                                                                                                           | Vande Velde et al., 2011 |
|                  |                        | G93A                                                                      | Rat cortical and motor neurons                      | -Mitochondrial fragmentation only in motor neurons<br>-Impaired mitochondrial transport only in motor neurons                                         | Magrané et al., 2012     |
|                  |                        | G93A                                                                      | Mice spinal cord and muscles                        | Impaired mitochondrial biogenesis: decreased expression of PGC-1 $\alpha$ and downstream factors                                                      | Thau et al., 2012        |
|                  |                        | G93A                                                                      | Mice anterior half of lumbar spinal                 | Mitochondrial fragmentation: increased P-DRP1 and Fis1 levels versus decreased Mfn1 and OPA1 levels                                                   | Liu et al., 2013         |
|                  |                        | G93A                                                                      | Mice skeletal muscles                               | -Impaired mitochondrial biogenesis: decreased PGC-1 $\alpha$ , PGC-1 $\beta$ and NRF1 levels<br>-Mitochondrial fragmentation: decreased Mfn1/2 levels | Russell et al., 2013     |
|                  |                        | G93A                                                                      | Rat motor neurons                                   | -Mitochondrial fragmentation<br>-Impaired mitochondrial transport                                                                                     | Song et al., 2013        |
|                  |                        | G93A                                                                      | Mice motor and sciatic nerves                       | -Mitochondrial fragmentation only in sciatic nerves<br>-Impaired mitochondrial transport only in sciatic nerve                                        | Magrané et al., 2014     |
|                  |                        | G93A                                                                      | Mice motor neurons                                  | Activated mitophagy: accumulation of mitochondria-containing autophagic vacuoles                                                                      | Xie et al., 2015         |
|                  |                        | G93A                                                                      | Mice brain stem, spinal cord and peripheral tissues | Impaired mitochondrial biogenesis: decreased PGC-1 $\alpha$ levels only in the nervous system                                                         | Bayer et al., 2017       |
| TDP-43           | RNA metabolism         | WT, CTF                                                                   | M17 human neuroblastoma cells                       | Mitophagy not activated: no conversion of LC3-I to LC3-II                                                                                             | Zhang et al., 2010       |
|                  |                        | WT, CTF                                                                   | Fly photoreceptor neurons                           | Activated mitophagy: degenerating mitochondria and autophagic vacuoles only with WT TDP-43                                                            | Li et al., 2010          |
|                  |                        | WT                                                                        | Mice brain neurons                                  | Mitochondrial fragmentation: increased P-DRP1 and Fis1 levels versus decreased Mfn1 levels                                                            | Xu et al., 2010          |
|                  |                        | WT, M337V                                                                 | Mice brain neurons                                  | No mitochondrial fragmentation: Fis1 and Mfn1 levels unchanged                                                                                        | Xu et al., 2011          |
|                  |                        | WT, CTF, Q331K, M337V                                                     | NSC-34 cells                                        | Activated mitophagy: increased LC3-II and decreased p62 on mitochondria                                                                               | Hong et al., 2012        |
|                  |                        | WT, Q331K, M337V                                                          | Rat and mice motor neurons                          | -Mitochondrial fragmentation<br>-Impaired mitochondrial transport                                                                                     | Wang et al., 2013        |
|                  |                        | WT, M337V                                                                 | Mice brain neurons                                  | Mitophagy not activated: no significant change in LC3 and p62 levels                                                                                  | Janssens et al., 2013    |
|                  |                        | A315T                                                                     | Mice motor and sciatic nerves                       | -Mitochondrial fragmentation only in sciatic nerves<br>-Impaired mitochondrial transport only in sciatic nerves                                       | Magrané et al., 2014     |
|                  |                        | A315T                                                                     | Mice brain neurons                                  | -Impaired mitophagy: decreased Parkin levels<br>-Mitochondrial fragmentation: decreased OPA1 levels                                                   | Stribl et al., 2014      |
|                  |                        | M337V                                                                     | NSC-34 cells                                        | Mitochondrial fragmentation                                                                                                                           | Finelli et al., 2015     |
|                  |                        | M337V                                                                     | NSC-34 cells                                        | Mitochondrial fragmentation                                                                                                                           | Finelli et al., 2015     |
|                  |                        | A382T                                                                     | Patient fibroblasts                                 | Mitochondrial fragmentation: increased Fis1 levels, Mfn1 levels unchanged                                                                             | Onesto et al., 2016      |
| A382T            | Patient fibroblasts    | Mitochondrial fragmentation: increased Fis1 levels, Mfn1 levels unchanged | Onesto et al., 2016                                 |                                                                                                                                                       |                          |

**Table 1 Continued**

| ALS-related gene | Gene function                                          | Studied gene form | Study model                                            | Mitochondrial quality control defects                                                                                                                                                                           | Reference                |
|------------------|--------------------------------------------------------|-------------------|--------------------------------------------------------|-----------------------------------------------------------------------------------------------------------------------------------------------------------------------------------------------------------------|--------------------------|
|                  |                                                        | A382T             | Patient fibroblasts                                    | Mitochondrial fragmentation: increased Fis1 levels, Mfn1 levels unchanged                                                                                                                                       | Onesto et al., 2016      |
|                  |                                                        | WT, M337V         | Fly motor neurons                                      | Unaltered mitochondrial transport                                                                                                                                                                               | Baldwin et al., 2016     |
|                  |                                                        | WT, G298S, A382T  | HEK293 cells, rat primary neurons, patient fibroblasts | Mitochondrial fragmentation                                                                                                                                                                                     | Wang et al., 2016        |
|                  |                                                        | WT, A315T         | Mice motor cortex                                      | Mitochondrial fragmentation                                                                                                                                                                                     | Wang et al., 2016        |
|                  |                                                        | WT, G298S         | Fly brain neurons                                      | Mitochondrial fragmentation: decreased Mfn levels                                                                                                                                                               | Khalil et al., 2017      |
| FUS              | RNA metabolism                                         | WT, R521G, R521H  | Mice motor neurons                                     | Mitochondrial fragmentation only with FUS mutants                                                                                                                                                               | Tradewell et al., 2012   |
|                  |                                                        | WT, P525L         | HT22 cells, mice and fly cortical neurons              | Mitochondrial fragmentation                                                                                                                                                                                     | Deng et al., 2015        |
|                  |                                                        | WT, P525L         | HEK293 cells                                           | Activated mitophagy: increased PINK1, Parkin and Ub-Miro1 levels                                                                                                                                                | Chen et al., 2016        |
|                  |                                                        | WT, P525L         | Fly motor neurons                                      | Impaired mitochondrial transport                                                                                                                                                                                | Chen et al., 2016        |
| C9orf72          | Nucleocytoplasmic and endosomal trafficking, autophagy | GGGGCC mutant     | Patient fibroblasts                                    | -Mitochondrial fragmentation<br>-Altered mitophagy: degenerating mitochondria and autophagic vacuoles, but LC3-I not converted to LC3-II<br>-Impaired mitochondrial biogenesis: increased PGC-1 $\alpha$ levels | Onesto et al., 2016      |
| VCP              | Protein quality control, vesicle trafficking           | A232E             | MEFs                                                   | Reduced mitophagy                                                                                                                                                                                               | Kim et al., 2013         |
| OPTN             |                                                        | E478G             | HeLa cells                                             | Reduced mitophagy: decreased LC3 recruitment to mitochondria                                                                                                                                                    | Wong and Holzbaur, 2014  |
|                  | Autophagy, vesicle trafficking                         | E478G, Q398X      | HeLa cells                                             | Reduced mitophagy: decreased LC3 recruitment to mitochondria                                                                                                                                                    | Moore and Holzbaur, 2016 |
| TBK1             | Autophagy                                              | E696K             | HeLa cells                                             | Reduced mitophagy: decreased LC3 recruitment to mitochondria                                                                                                                                                    | Moore and Holzbaur, 2016 |
| CHCHD10          | Mitochondrial cristae uncton and nucleoid regulation   | S59L              | Patient fibroblasts                                    | Mitochondrial fragmentation                                                                                                                                                                                     | Bannwarth et al., 2014   |
| VAPB             | Vesicle trafficking, calcium signaling                 | WT, P56S          | Rat cortical neurons                                   | Reduced anterograde mitochondrial transport only with mutant VAPB                                                                                                                                               | Morotz et al., 2012      |

ALS: Amyotrophic lateral sclerosis; CTF: C-terminal fragments; LC3: microtubule-associated protein 1A/1B-light chain 3; MEFs: murine embryonic fibroblasts; MPQC: mitochondrial protein quality control; P: phosphorylated; Ub, ubiquitinated; VAPB: vesicle-associated membrane protein-associated protein B/C; VCP: valosin-containing protein; WT: wild-type.
